# Supplementary material for: The Content of Phenolic Compounds and Radical Scavenging Activity Varies with Carrot Origin and Root Color
Source: Springer Nature journal article supplement (doi:10.1007/s11130-013-0351-3), 2013-04-23
Supplement: 11130_2013_351_MOESM1_ESM.pdf [file 11130_2013_351_MOESM1_ESM.pdf]

## Online Resource 1. Plant material

| No. | Root color | FS No. | Accession Name                | Source <sup>a</sup> /No. | Country | Origin | Type <sup>b</sup> | Status <sup>c</sup> |
|-----|------------|--------|-------------------------------|--------------------------|---------|--------|-------------------|---------------------|
| 1.  | orange     | FS_43  | Amsterdam 3                   | Commercial               | POL     | Europe | W                 | OP                  |
| 2.  | orange     | FS_50  | BL-CR2-6032                   | Satimex / 6032           | DEU     | Europe | W                 | BP                  |
| 3.  | orange     | FS_70  | BL-JKI-4                      | JKI                      | IND     | Asia   | E                 | BP                  |
| 4.  | orange     | FS_71  | BL-JKI-5                      | JKI                      | IND     | Asia   | E                 | BP                  |
| 5.  | orange     | FS_49  | Finezja                       | Spojnia                  | POL     | Europe | W                 | OP                  |
| 6.  | orange     | FS_72  | Garga Serk                    | WGRU / 10264             | PAK     | Asia   | E                 | LR                  |
| 7.  | orange     | FS_42  | Hekinan Senko 5sun            | MKS                      | JPN     | JPN    | W                 | OP                  |
| 8.  | orange     | FS_39  | Kokubu Senko Oonaga           | MKS                      | JPN     | JPN    | E                 | OP                  |
| 9.  | orange     | FS_74  | Long Red                      | WGRU / 10246             | ETH     | Africa | E                 | LR                  |
| 10. | orange     | FS_36  | Nantes Apollo                 | NGB                      | DNK     | Europe | W                 | OP                  |
| 11. | orange     | FS_06  | Nerac                         | Bejo                     | NLD     | Europe | W                 | F1                  |
| 12. | orange     | FS_75  | Red Carrot                    | WGRU / 10355             | CHN     | Asia   | E                 | LR                  |
| 13. | orange     | FS_05  | Santa Cruz                    | Seminis                  | USA     | USA    | W                 | OP                  |
| 14. | orange     | FS_40  | Sapporo Futo                  | MKS                      | JPN     | JPN    | W                 | OP                  |
| 15. | orange     | FS_69  | Stratova                      | WGRU / 10626             | CSK     | Europe | W                 | OP                  |
| 16. | purple     | FS_09  | Anthonina                     | Seminis                  | USA     | USA    | W                 | OP                  |
| 17. | purple     | FS_07  | Deep Purple                   | Bejo                     | NLD     | Europe | E                 | F1                  |
| 18. | red        | FS_47  | Gajar                         | WGRU / 10146             | PAK     | Asia   | E                 | LR                  |
| 19. | red        | FS_73  | Kintoki                       | WGRU / 7174              | JPN     | JPN    | E                 | LR                  |
| 20. | red        | FS_04  | Nutrired                      | Seminis                  | USA     | USA    | E                 | OP                  |
| 21. | red        | FS_22  | Pusa Kesar                    | WGRU / 6755              | IND     | Asia   | E                 | LR                  |
| 22. | red        | FS_38  | Shahpur Special               | WGRU / 6752              | IND     | Asia   | E                 | LR                  |
| 23. | white      | FS_11  | Blanche 1/2 longue des vosges | INH                      | FRA     | Europe | W                 | OP                  |
| 24. | white      | FS_10  | Kuettiger                     | JKI                      | CHE     | Europe | W                 | OP                  |
| 25. | white      | FS_64  | Mestnaya                      | WGRU / 13405             | RUS     | Asia   | E                 | LR                  |
| 26. | white      | FS_45  | White Belgian                 | WGRU / 8720              | GBR     | Europe | W                 | OP                  |
| 27. | white      | FS_01  | White Satin                   | Bejo                     | NLD     | Europe | W                 | F1                  |
| 28. | yellow     | FS_03  | BL-710015                     | Seminis                  | USA     | USA    | W                 | BP                  |
| 29. | yellow     | FS_37  | China Yellow                  | MKS                      | CHN     | Asia   | E                 | OP                  |
| 30. | yellow     | FS_46  | Lobbericher                   | Commercial               | DEU     | Europe | W                 | OP                  |
| 31. | yellow     | FS_68  | Mestnaya-S2-p                 | WGRU / 13405             | RUS     | Asia   | E                 | LR                  |
| 32. | yellow     | FS_67  | Mestnaya-S1-y                 | WGRU / 13405             | RUS     | Asia   | E                 | LR                  |
| 33. | yellow     | FS_41  | Shima Ninjin                  | MKS                      | JPN     | JPN    | E                 | OP                  |
| 34. | yellow     | FS_63  | Yellow Belgian                | DAU                      | NLD     | Europe | W                 | OP                  |
| 35. | yellow     | FS_02  | Yellowstone                   | Bejo                     | NLD     | Europe | E                 | OP                  |

<sup>a</sup> Source: Bejo – Bejo Zaden B.V., Warmenhuizen, Netherlands; DAU – Leibniz Institute of Plant

Genetics and Crop Plant Research, Gatersleben, Germany; INH – Institut National d’Horticulture et de

Paysage, Angers, France; JKI – Julius Kühn Institute, Quedlinburg, Germany; MKS – Mikado Kyowa

Seed Co. Ltd., Chosei, Japan; NGB – Nordic Genetic Center, Alnarp, Sweden; Satimex – Satimex

Quedlinburg Handelsgesellschaft GmbH, Quedlinburg, Germany; Spojnia – Spójnia Hodowla i

Nasiennictwo Ogrodnicze Ltd. Nochow, Poland; WGRU – Warwick Genetic Resources Unit, Warwick

University, Wellesbourne, England

<sup>b</sup> Type: Accessions were classified to either the Eastern (E) or Western (W) type according to DNA

analysis of simple sequence repeats (Baranski, Maksylewicz-Kaul, Nothnagel, Cavagnaro, Simon &

Grzebelus, 2012) or the accession origin

<sup>c</sup> Status: BP – breeding population; OP – open pollinated cultivar; F1 – hybrid; LR - landrace
